# Supplementary material
Source: PubMed Central journal article supplement (PMC7596869)
Supplement: oc0c00552_si_001.pdf [file oc0c00552_si_001.pdf]

Supporting Information for  
**“Highly Efficient Photo/Electrocatalytic Reduction of Nitrogen  
into Ammonia by Dual-metal Sites”**

Shiyan Wang, Li Shi, Xiaowan Bai, Qiang Li, Chongyi Ling and Jinlan Wang\*

School of Physics, Southeast University, Nanjing 211189, China

\*E-mail: [jlwang@seu.edu.cn](mailto:jlwang@seu.edu.cn).

**Table S1.** Computed formation energy ( $E_f$ ) and dissolution potential ( $U_{diss}$ ) of dual-metals,  $U_{diss}^0$  and  $N_e$  are the standard dissolution potential of bulk metal and the number of transferred electrons involved in the dissolution, respectively. The electrochemically unstable systems are depicted by **red** color.  $N_e = [N_e(TM1) + N_e(TM2)]/2$ ,  $U_{diss}^0 = [U_{diss}^0(TM1) + U_{diss}^0(TM2)]/2$ .

| Metal       | $N_e$ | $U_{diss}^0$ (V) | $E_f$ (eV) | $U_{diss}$ (V) |
|-------------|-------|------------------|------------|----------------|
| TiCr        | 2     | -1.27            | -3.95      | 0.71           |
| TiMn        | 2     | -1.41            | -4.34      | 0.76           |
| <b>TiFe</b> | 2     | -1.04            | 0.86       | <b>-1.47</b>   |
| <b>TiCo</b> | 2     | -0.96            | -1.75      | <b>-0.08</b>   |
| <b>TiNi</b> | 2     | -0.95            | -1.17      | <b>-0.36</b>   |
| TiMo        | 2.5   | -0.88            | -2.91      | 0.28           |
| TiW         | 2.5   | -0.78            | -1.97      | 0.01           |
| CrMn        | 2     | -1.05            | -4.64      | 1.27           |
| CrFe        | 2     | -0.68            | -3.52      | 1.08           |
| CrCo        | 2     | -0.60            | -2.99      | 0.90           |
| <b>CrNi</b> | 2     | -0.59            | 1.26       | <b>-1.22</b>   |
| <b>CrMo</b> | 2.5   | -0.52            | 0.83       | <b>-0.94</b>   |
| CrW         | 2.5   | -0.42            | -5.71      | 1.86           |
| MnFe        | 2     | -0.82            | -3.97      | 1.17           |
| MnCo        | 2     | -0.74            | -3.44      | 0.99           |
| MnNi        | 2     | -0.73            | -1.59      | 0.07           |
| MnMo        | 2.5   | -0.66            | -3.90      | 0.90           |
| MnW         | 2.5   | -0.56            | -2.92      | 0.61           |
| FeCo        | 2     | -0.37            | -2.10      | 0.69           |
| FeNi        | 2     | -0.36            | -1.42      | 0.36           |
| FeMo        | 2.5   | -0.29            | -2.34      | 0.65           |

|      |     |       |       |       |
|------|-----|-------|-------|-------|
| FeW  | 2.5 | -0.19 | 2.00  | -0.99 |
| CoNi | 2   | -0.27 | -0.77 | 0.12  |
| CoMo | 2.5 | -0.21 | 1.80  | -0.93 |
| CoW  | 2.5 | -0.11 | 1.49  | -0.71 |
| NiMo | 2.5 | -0.19 | -0.78 | 0.52  |
| NiW  | 2.5 | -0.10 | 0.51  | -0.30 |
| MoW  | 3   | -0.03 | -1.78 | 0.56  |

**Table S2.**  $Q_1$  and  $Q_2$  represent charge transfer from dual-metals sites to  $N_2$  and  $N_2H$ , respectively.  $Q_3$  [ $Q_2(Mo)-Q_2(Fe, Ti, Ni \text{ or } W)$ ] represent charge transfer from TM1 to TM2.  $Q_1$  and  $Q_2$  are relative to the charge of M1M2/g- $C_3N_4$ .

| Metal | $Q_1$ |      | $Q_2$ |      | $Q_3$ |
|-------|-------|------|-------|------|-------|
| MoMo  | Mo1   | Mo2  | Mo1   | Mo2  | ~0.00 |
|       | 0.24  | 0.27 | 0.54  | 0.53 |       |
| FeMo  | Fe    | Mo   | Fe    | Mo   | 0.43  |
|       | 0.11  | 0.24 | 0.09  | 0.52 |       |
| TiMo  | Ti    | Mo   | Ti    | Mo   | 0.33  |
|       | 0.19  | 0.28 | 0.21  | 0.54 |       |
| NiMo  | Ni    | Mo   | Ni    | Mo   | 0.36  |
|       | 0.15  | 0.26 | 0.16  | 0.52 |       |
| MoW   | W     | Mo   | W     | Mo   | 0.38  |
|       | 0.14  | 0.25 | 0.15  | 0.53 |       |

**Table S3.** Calculated  $\Delta ZPE$  and  $T\Delta S$  of gas molecules and intermediates on catalyst, the \* represent end-on mode, while \*\* represent side-on mode.

| species          | $\Delta ZPE$ (eV) | $T\Delta S$ (eV) | Species       | $\Delta ZPE$ (eV) | $T\Delta S$ (eV) |
|------------------|-------------------|------------------|---------------|-------------------|------------------|
| $N_2$            | 0.14              | 0.59             | $NH_3$        | 0.85              | 0.60             |
| $H_2$            | 0.27              | 0.40             | $H^*$         | 0.17              | 0                |
| $N\equiv N^{**}$ | 0.22              | 0.10             | $N\equiv N^*$ | 0.23              | 0.11             |
| $N=NH^{**}$      | 0.46              | 0.11             | $N=NH^*$      | 0.53              | 0.15             |
| $NH-NH^{**}$     | 0.80              | 0.18             | $NH-NH^*$     | 0.88              | 0.12             |
| $NH-NH_2^{**}$   | 1.14              | 0.11             | $NH-NH_2^*$   | 1.21              | 0.15             |
| $NH_2-NH_2^{**}$ | 1.47              | 0.15             | $NH_2-NH_2^*$ | 1.52              | 0.20             |
| $NH_2-NH_3^{**}$ | 1.70              | 0.13             | $NH^*$        | 0.33              | 0.06             |
| $NH_2^{**}$      | 0.66              | 0.14             | $N^*$         | 0.08              | 0.06             |
| $NH_3^{**}$      | 0.98              | 0.16             | $N-NH_2^*$    | 0.81              | 0.14             |

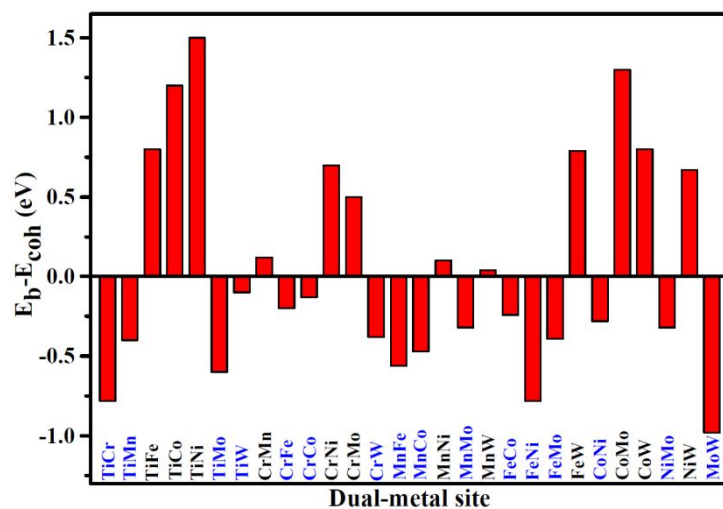

**Figure S1.** Energy difference between the adsorption energy ( $E_b$ ) of metal dimers anchored on g- $C_3N_4$  and the cohesive energy ( $E_{coh}$ ) of metal atoms in their crystals.

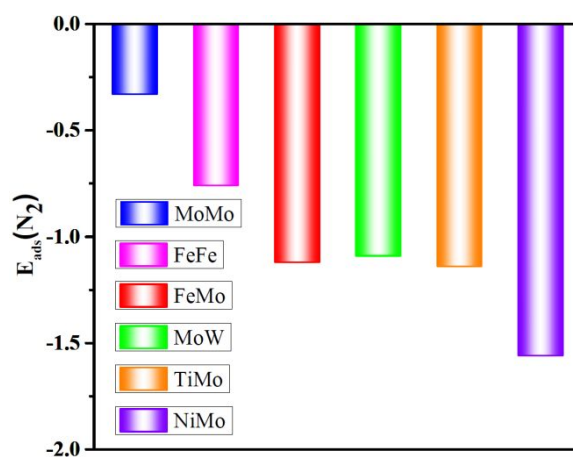

**Figure S2.** Adsorption energy of  $N_2$  on MoMo, FeFe, FeMo, MoW, NiMo and TiMo dimers.

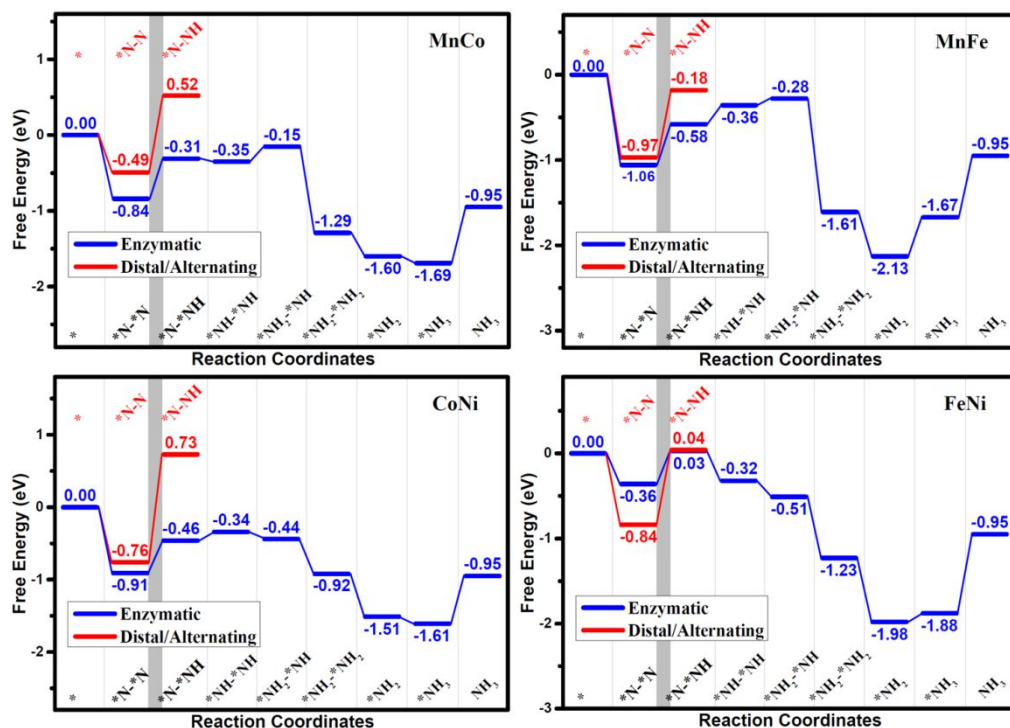

**Figure S3.** Free energy diagrams for NRR at zero potential on MnCo/g-C<sub>3</sub>N<sub>4</sub>, MnFe/g-C<sub>3</sub>N<sub>4</sub>, CoNi/g-C<sub>3</sub>N<sub>4</sub>, FeNi/g-C<sub>3</sub>N<sub>4</sub> along distal, alternating and enzymatic mechanisms. The protonation process of  $*N_2 + (H^+ + e^-) \rightarrow *N_2H$  is the PDS.

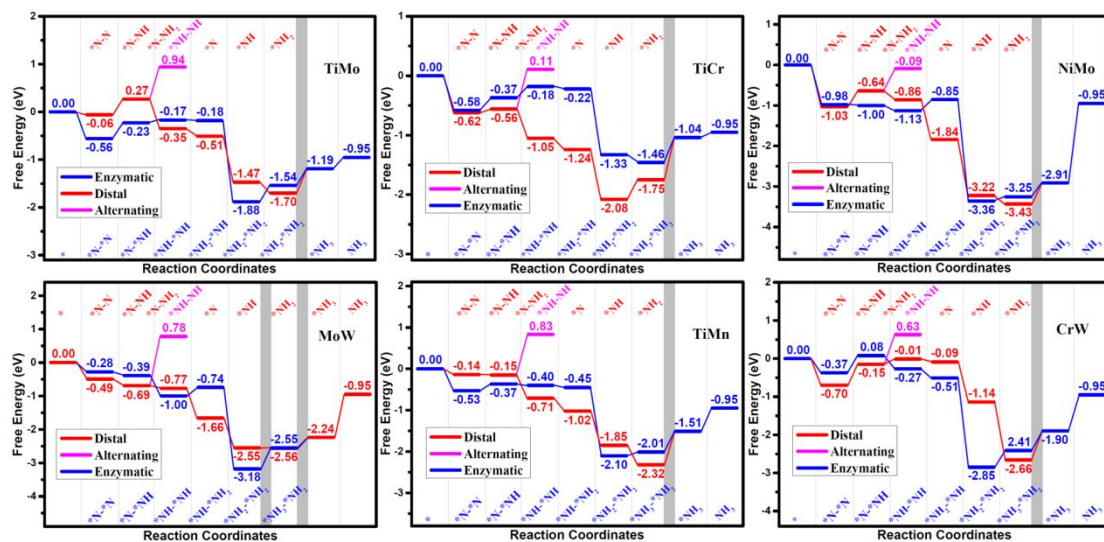

**Figure S4.** Free energy diagrams for NRR at zero potential on TiMo/g-C<sub>3</sub>N<sub>4</sub>, TiCr/g-C<sub>3</sub>N<sub>4</sub>, NiMo/g-C<sub>3</sub>N<sub>4</sub>, MoW/g-C<sub>3</sub>N<sub>4</sub>, TiMn/g-C<sub>3</sub>N<sub>4</sub> and CrW/g-C<sub>3</sub>N<sub>4</sub> along distal, alternating and enzymatic paths. The protonation process of  $*NH_3NH_2/*NH_2 + (H^+ + e^-) \rightarrow *NH_3$  is the PDS.

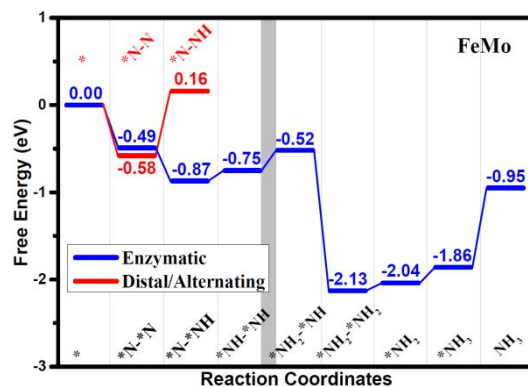

**Figure S5.** Free energy diagrams for NRR at zero potential on FeMo/g-C<sub>3</sub>N<sub>4</sub> along distal, alternating and enzymatic mechanisms. The protonation process of \*NHNH + (H<sup>+</sup> + e<sup>-</sup>) → \*NH<sub>2</sub>NH is the PDS.

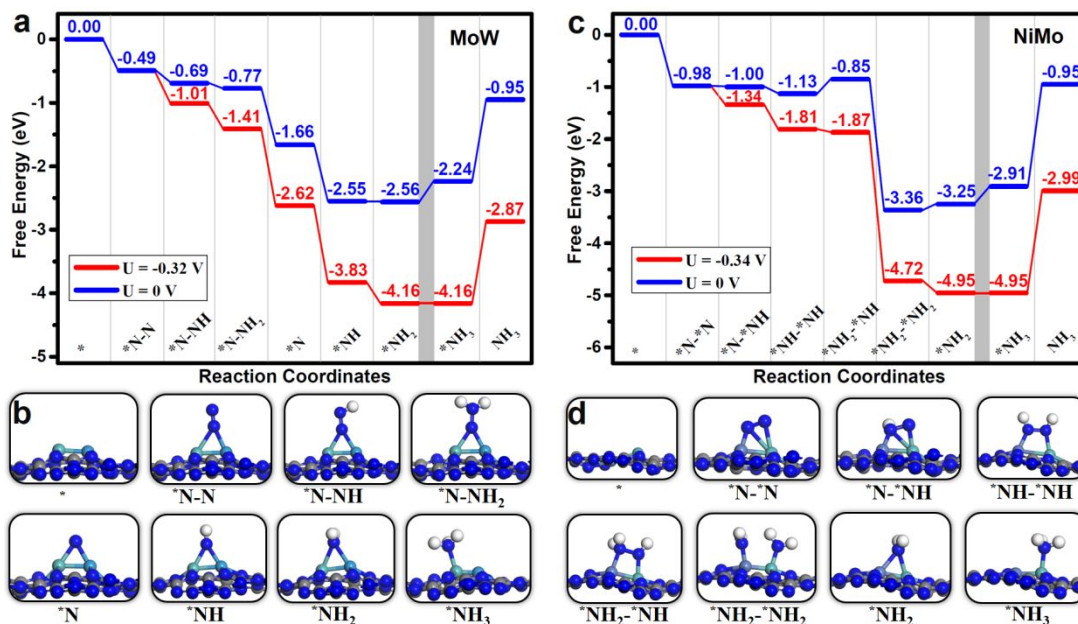

**Figure S6.** Free energy diagrams for the reduction of N<sub>2</sub> to NH<sub>3</sub> on (a) MoW/g-C<sub>3</sub>N<sub>4</sub> and (c) NiMo/g-C<sub>3</sub>N<sub>4</sub> at different applied potentials, and the corresponding configurations of NRR intermediates on (b) MoW/g-C<sub>3</sub>N<sub>4</sub> and (d) NiMo/g-C<sub>3</sub>N<sub>4</sub>. The gray, blue, white, violet, light blue and cyan balls represent C, N, H, Ni, W and Mo atoms, respectively.

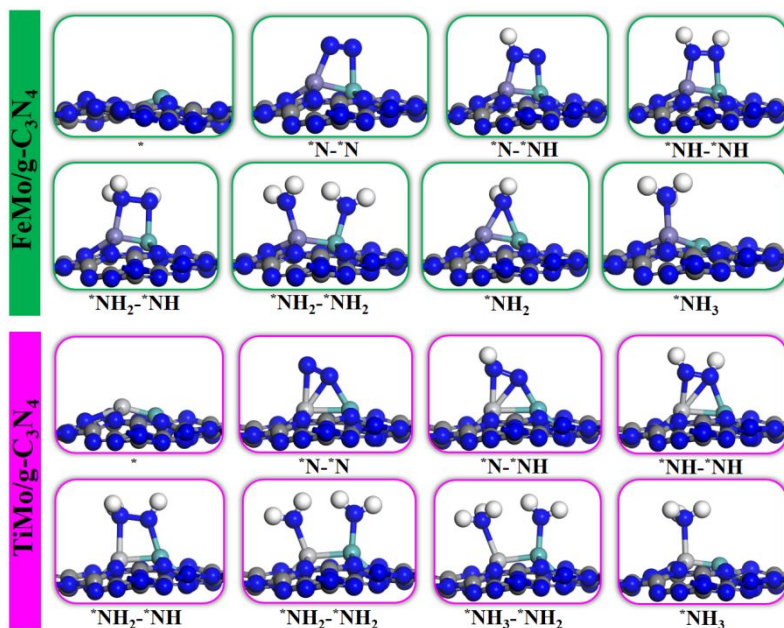

**Figure S7.** Optimized geometric of various intermediates along the most favorable path of NRR proceeded on FeMo/g-C<sub>3</sub>N<sub>4</sub> and TiMo/g-C<sub>3</sub>N<sub>4</sub>. The gray, blue, white, light grey, cyan and lavender balls represent C, N, H, Ti, Mo and Fe atoms, respectively.

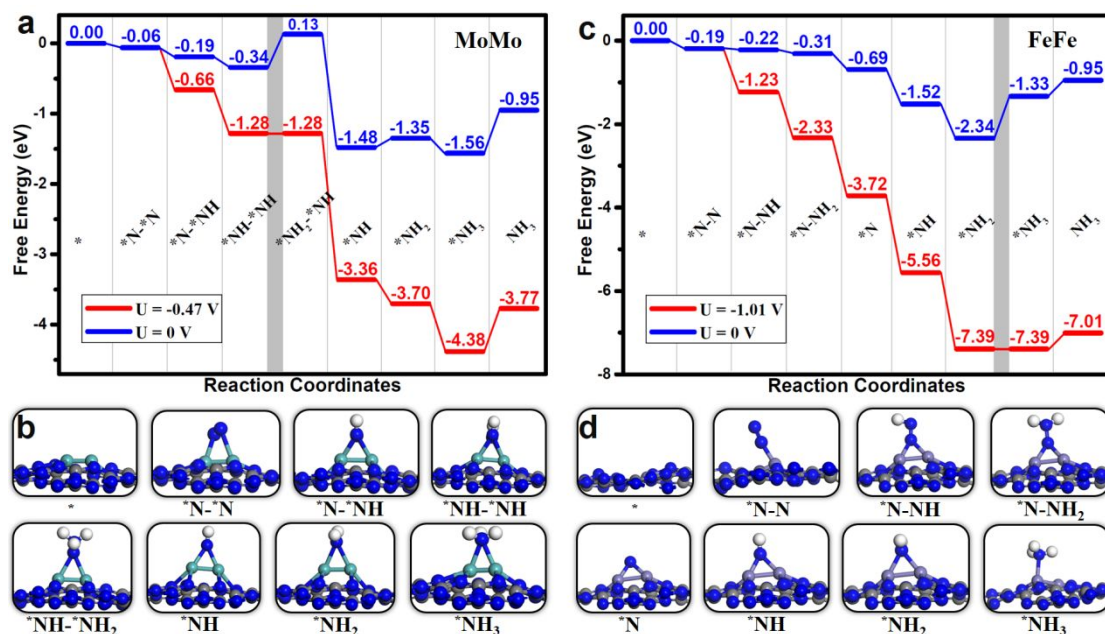

**Figure S8.** Free energy diagrams for the reduction of N<sub>2</sub> to NH<sub>3</sub> on (a) MoMo/g-C<sub>3</sub>N<sub>4</sub> and (c) FeFe/g-C<sub>3</sub>N<sub>4</sub> at different applied potentials, and the corresponding configurations of NRR intermediates on (b) MoMo/g-C<sub>3</sub>N<sub>4</sub> and (d) FeFe/g-C<sub>3</sub>N<sub>4</sub>. The gray, blue, white, cyan and lavender balls represent C, N, H, Mo and Fe atoms, respectively.

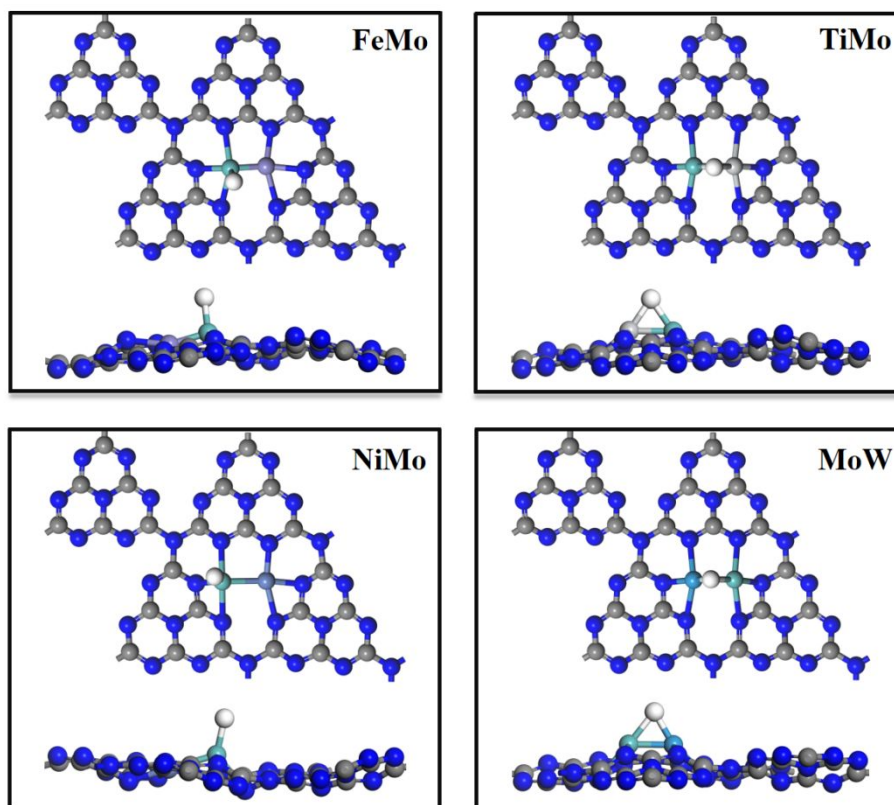

**Figure S9.** Optimized geometries of H\* adsorbed on FeMo/g-C<sub>3</sub>N<sub>4</sub>, TiMo/g-C<sub>3</sub>N<sub>4</sub>, NiMo/g-C<sub>3</sub>N<sub>4</sub> and MoW/g-C<sub>3</sub>N<sub>4</sub>. The gray, blue, white, light grey, cyan, lavender and violet balls represent C, N, H, Ti, Mo, Fe and Ni atoms, respectively.

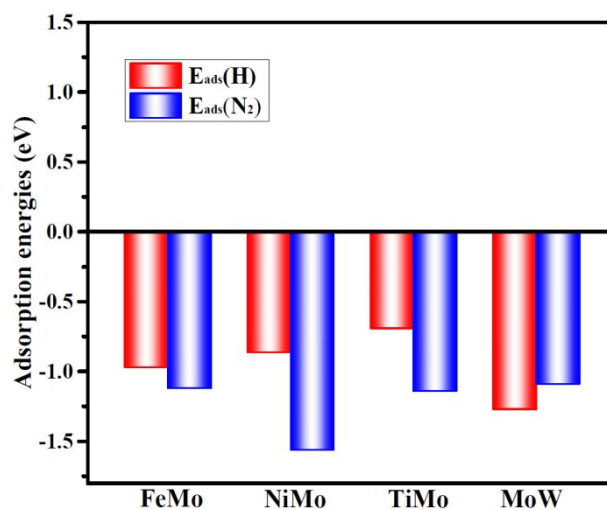

**Figure S10.** Comparison of the adsorption energies for \*H and \*N<sub>2</sub> on FeMo, TiMo, MoW and NiMo dual-metal catalysts.

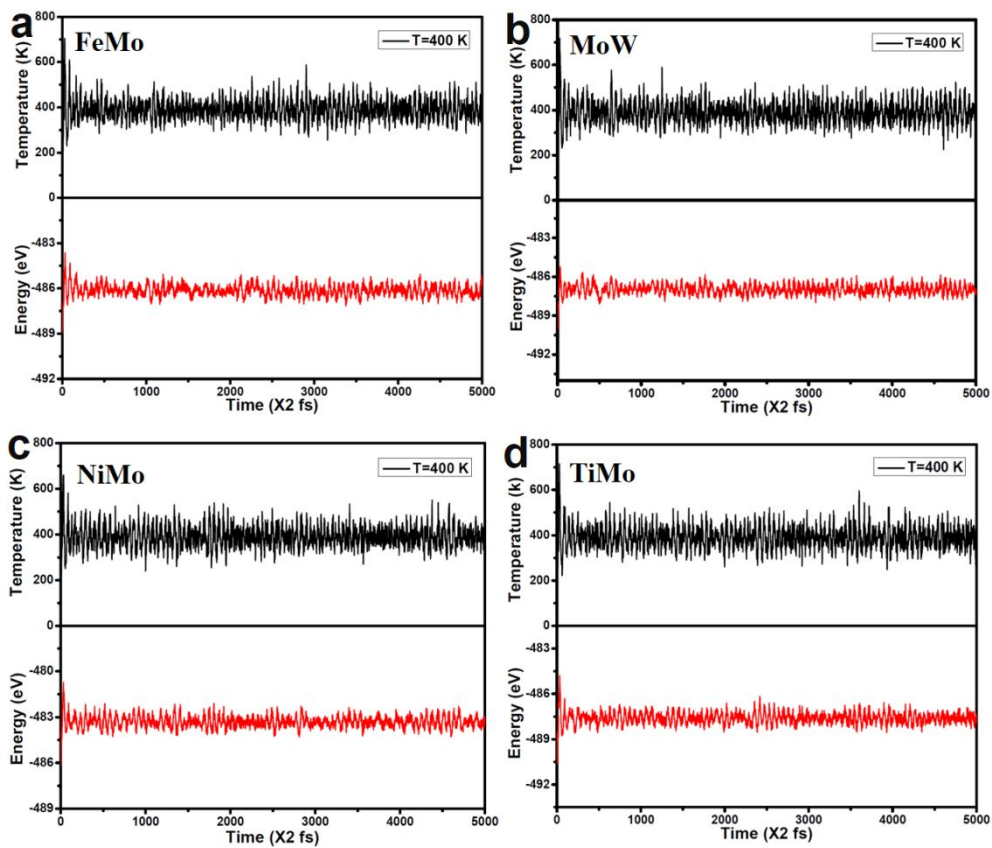

**Figure S11.** Variations of temperature and energy fluctuations versus the AIMD simulation time for **(a)** FeMo/g-C<sub>3</sub>N<sub>4</sub>, **(b)** MoW/g-C<sub>3</sub>N<sub>4</sub>, **(c)** NiMo/g-C<sub>3</sub>N<sub>4</sub> and **(d)** TiMo/g-C<sub>3</sub>N<sub>4</sub>. The simulation is run under 400 K for 10 ps with a time step of 2 fs.



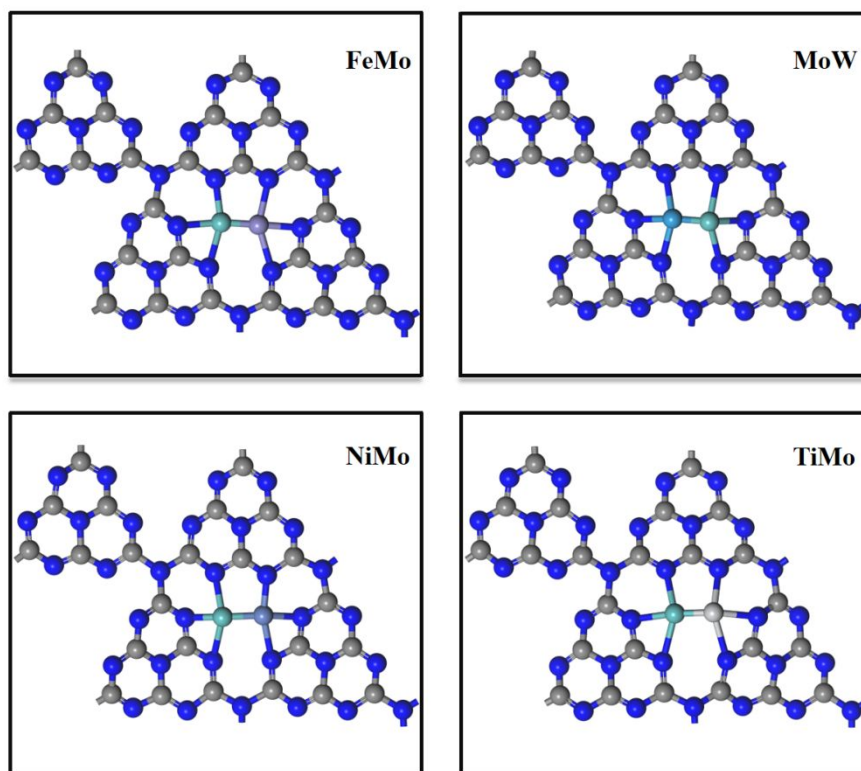

**Figure S12.** The snapshot of geometric structure of the last AIMD simulations step of FeMo/g-C<sub>3</sub>N<sub>4</sub>, MoW/g-C<sub>3</sub>N<sub>4</sub>, NiMo/g-C<sub>3</sub>N<sub>4</sub> and TiMo/g-C<sub>3</sub>N<sub>4</sub>. The gray, blue, white, light grey, cyan, lavender and violet balls represent C, N, H, Ti, Mo, Fe and Ni atoms, respectively.

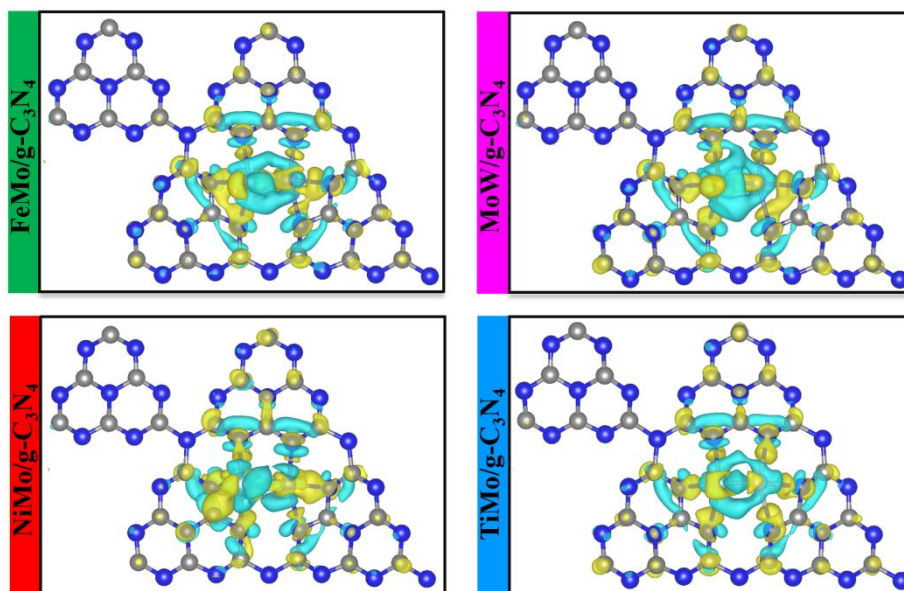

**Figure S13.** Charge density difference of FeMo/g-C<sub>3</sub>N<sub>4</sub>, MoW/g-C<sub>3</sub>N<sub>4</sub>, NiMo/g-C<sub>3</sub>N<sub>4</sub> and TiMo/g-C<sub>3</sub>N<sub>4</sub> at isosurfaces of  $\pm 0.001 \text{ e}/\text{\AA}^3$ , where the positive and negative charges are shown in yellow and cyan, respectively.

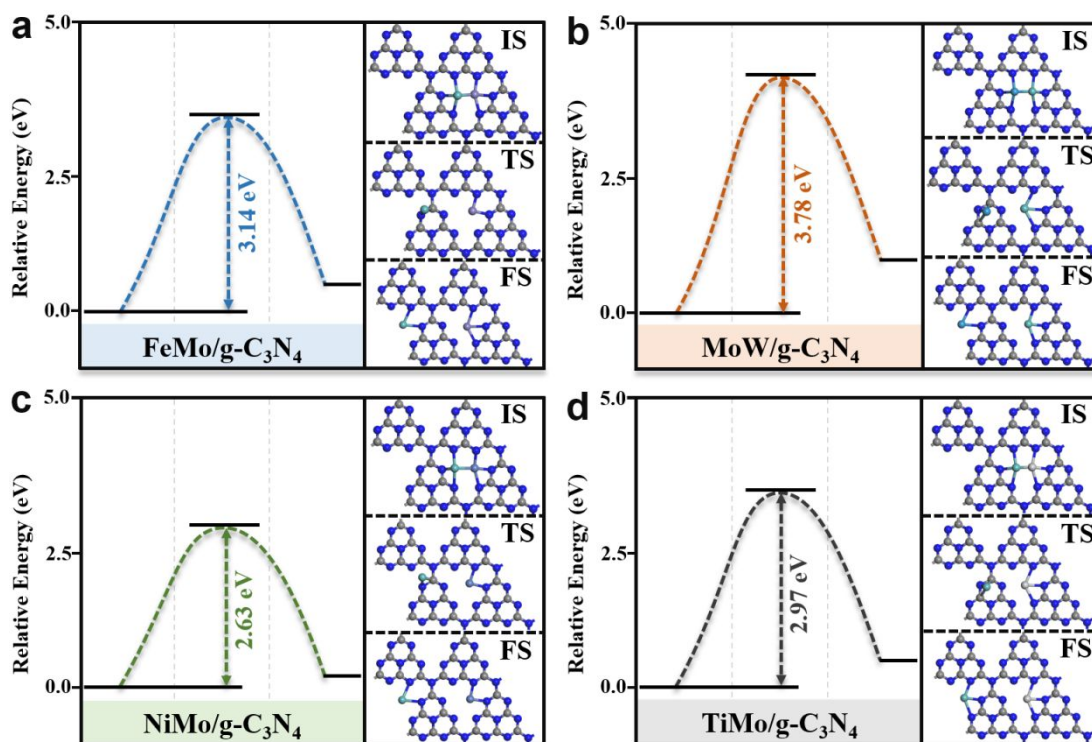

**Figure S14.** Atomic configurations for the dissociation of (a) FeMo (b) MoW (c) NiMo (d) TiMo dual-metals to form two separated monomers, including IS, TS, and FS. The gray, blue, white, light grey, cyan, lavender and violet balls represent C, N, H, Ti, Mo, Fe and Ni atoms, respectively.

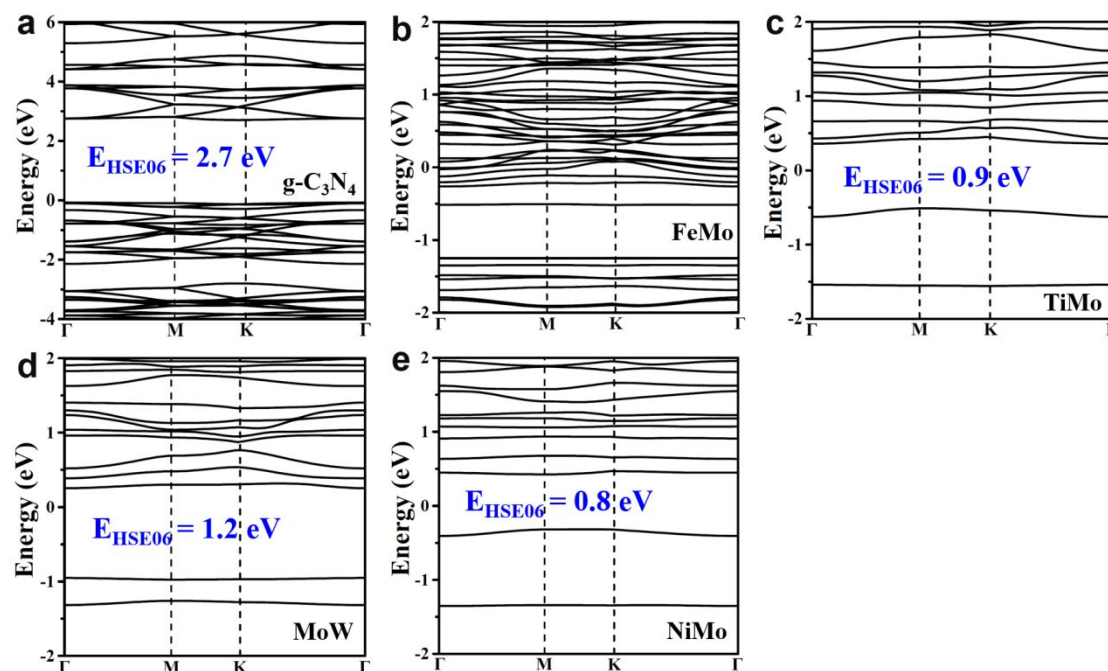

**Figure S15.** Electronic band structures of (a) pristine  $g\text{-C}_3\text{N}_4$ , (b) FeMo/ $g\text{-C}_3\text{N}_4$ , (c) TiMo/ $g\text{-C}_3\text{N}_4$ , (d) MoW/ $g\text{-C}_3\text{N}_4$  and (e) NiMo/ $g\text{-C}_3\text{N}_4$ . The Fermi level was set to zero.

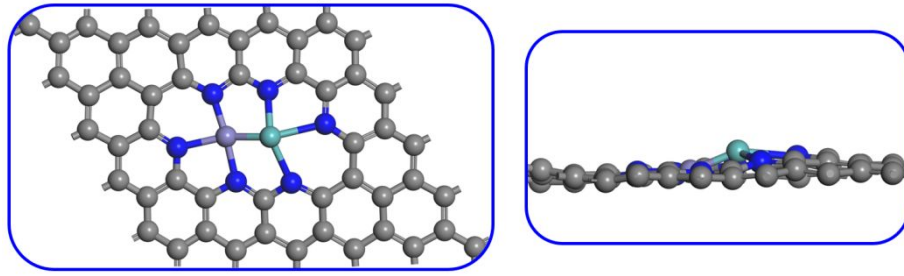

**Figure S16.** Top and side views of the atomic configuration of the last AIMD simulation step of FeMo/graphene. The gray, blue, cyan and lavender balls represent C, N, Mo and Fe atoms, respectively.

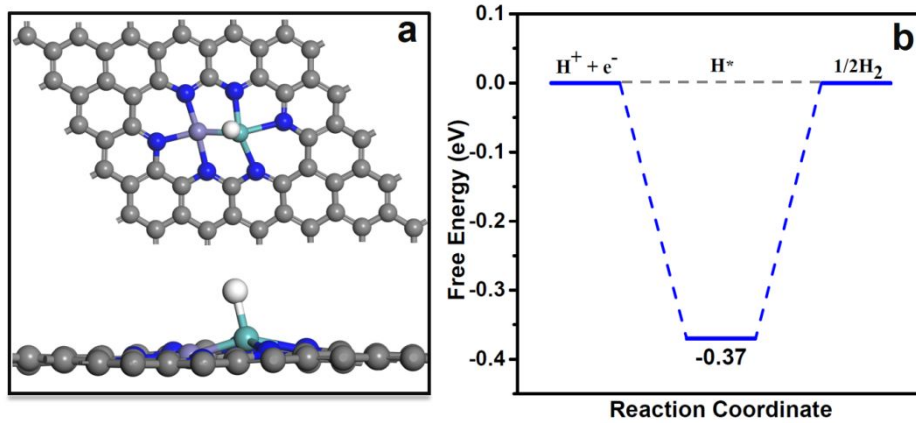

**Figure S17.** (a) Optimized geometries of H\* adsorbed on FeMo/graphene. (b) Free energy diagrams of HER on FeMo/graphene. The gray, blue, white, cyan and lavender balls represent C, N, H, Mo and Fe atoms, respectively.

### Computational details

The average binding energy of the dopant is calculated for the as following:

$$E_b = \frac{1}{2}(E_{M1M2/g-C3N4} - E_{g-C3N4} - E_{M1} - E_{M2})$$

where  $E_{M1M2/g-C3N4}$ ,  $E_{g-C3N4}$ ,  $E_{M1/2}$  are the energies of M1M2/g-C3N4, substrate without metal dimer, and single metal atoms in a vacuum, respectively.

The cohesive energy of transition metal atom is calculated by the following equations:

$$E_{coh} = \frac{1}{N}E_{TM(bulk)} - E_{TM}$$

where  $E_{TM(bulk)}$  is the total energy of transition metal bulk, N is the number of metal atoms in the bulk, and the  $E_{TM}$  is the energy of the relevant single metal atom in a vacuum.

The stability of the doped system is calculated as:

$$\Delta E = E_b - E_{\text{coh}}$$

To evaluate the electrochemical stabilities of the heteronuclear DACs, we systematically investigated the dissolution potential ( $U_{\text{diss}}$ , versus SHE), which are defined as:

$$U_{\text{diss}} = U_{\text{diss}}^0(\text{metal, bulk}) - E_f/eN_e$$

where  $U_{\text{diss}}^0(\text{metal, bulk})$  and  $N_e$  are the standard dissolution potential of bulk metal and the number of electrons involved in the dissolution, respectively.  $E_f$  is the formation energy of the heteronuclear metal dimers embedded in g-C<sub>3</sub>N<sub>4</sub> monolayer.

The binding energy,  $E_b(\text{N})$ ,  $E_b(\text{N}_2)$ ,  $E_b(\text{N}_2\text{H})$  and  $E_b(\text{NH}_2)$ , is defined as:

$$E_b(\text{N}) = E(\text{N}^*) - E^* - \frac{1}{2}E[\text{N}_{2(\text{g})}]$$

$$E_b(\text{N}_2) = E(\text{N}_2^*) - E^* - E[\text{N}_{2(\text{g})}]$$

$$E_b(\text{N}_2\text{H}) = E(\text{N}_2\text{H}^*) - E^* - E[\text{N}_{2(\text{g})}] - \frac{1}{2}E[\text{H}_{2(\text{g})}]$$

$$E_b(\text{NH}_2) = E(\text{NH}_2^*) - E^* - \frac{1}{2}E[\text{N}_{2(\text{g})}] - E[\text{H}_{2(\text{g})}]$$

where  $E^*$ ,  $E[\text{(g)}]$  and  $E(^*)$  represent the total energies of the clean slab, the isolated adsorbed molecule and the slab after adsorption, respectively.

The Gibbs free energy change ( $\Delta G$ ) of each elementary reaction was calculated as

$$\Delta G = \Delta E + \Delta E_{\text{ZPE}} - T\Delta S + \Delta G_{\text{pH}} + \Delta G_{\text{U}} + \int C_p dT$$

where  $\Delta E$  is the total energy difference directly obtained from DFT calculations,  $\Delta E_{\text{ZPE}}$  is the change in zero-point energies,  $T$  is the temperature,  $\Delta S$  is the entropy change and  $C_p$  is the heat capacity.  $\Delta G_{\text{U}} = -neU$ , where  $n$  is the number of ( $\text{H}^+ + \text{e}^-$ ) pairs transferred in NRR and  $U$  is the electrode potential versus the reversible hydrogen electrode (RHE).  $\Delta G_{\text{pH}}$  is the correction of the  $\text{H}^+$  free energy by the concentration,  $\Delta G_{\text{pH}} = k_{\text{B}}T \times \ln 10 \times \text{pH}$ , where  $k_{\text{B}}$  is the Boltzmann constant, and the value of pH was set to be zero for acidic condition. Zero-point energies and entropies of the NRR intermediates were computed from the vibrational frequencies.

The entropies of the gaseous molecules were taken from the NIST Chemistry WebBook and the zero-point energy (ZPE) was calculated according to:

$$E_{\text{ZPE}} = \sum_{i=1}^{3N} \frac{h\nu_i}{2}$$

The entropy change for adsorbed intermediates was calculated within harmonic approximation:

$$\Delta S_{ads}(0 \rightarrow T, P^0) = S_{vib} = \sum_{i=1}^{3N} \left[ \frac{N_A h \nu_i}{T (e^{h\nu_i/K_B T} - 1)} - R \ln (1 - e^{-h\nu_i/K_B T}) \right]$$

Where  $\nu_i$  is DFT-calculated normal-mode frequency for species of  $3N$  degree of freedom ( $N$ =number of atoms) adsorbed on M1M2/g-C<sub>3</sub>N<sub>4</sub> DACs,  $N_A$  is the Avogadro's constant ( $6.022 \times 10^{23} \text{ mol}^{-1}$ ),  $h$  is the Planck's constant ( $6.626 \times 10^{-34} \text{ J s}$ ), and  $k_B$  is the Boltzmann constant ( $1.38 \times 10^{-23} \text{ JK}^{-1}$ ),  $R$  is the ideal gas constant ( $8.314 \text{ J K}^{-1} \text{ mol}^{-1}$ ), and  $T$  is the system temperature, and  $T=298\text{K}$  in this work. As shown in **Table S3**,  $\Delta\text{ZPE}$  and  $\Delta\text{S}$  are the differences between the adsorbed species and the gas phase molecules in zero-point energy and entropy, respectively.

The optical absorption coefficient  $\alpha(\omega)$  was calculated from the following relation:

$$\alpha(\omega) = \sqrt{2} \frac{\omega}{c} \left[ \sqrt{\varepsilon_1^2(\omega) + \varepsilon_2^2(\omega)} - \varepsilon_1(\omega) \right]^{1/2}$$

where  $\varepsilon_1(\omega)$  and  $\varepsilon_2(\omega)$  are the real part and imaginary part of dielectric function, respectively.

The imaginary part of dielectric function is selected as the optical absorption.
